# Supplementary material
Source: MDPI journal article supplement (https://www.mdpi.com/2075-5309/12/9/1322)
Supplement: s1 [file s1]

**Title:** Resilient capabilities to tackle supply chain risks: Managing integration complexities in construction projects

**Authors:** Afia Malik, Khurram Iqbal Ahmad Khan, Siddra Qayyum, Fahim Ullah and Ahsen Maqsoom

The Table containing all the calculated RII values (including those below the value of 0.75) is attached below.

**Table S1:** Relative Importance Index of SCs.

| SC Risks                                       | Sr # | Resilient Capabilities                                                  | Relative Importance Index (RII) |
|------------------------------------------------|------|-------------------------------------------------------------------------|---------------------------------|
| <b>01. Health Pandemic</b>                     | 1    | People, products & assets visibility (real-time data on location)       | 0.751633987                     |
|                                                | 2    | Collaborative information exchange (among stakeholders)                 | 0.68627451                      |
|                                                | 3    | Business intelligence gatherings (future trends & technology awareness) | 0.718954248                     |
|                                                | 4    | Alternative suppliers/ sources to quickly reallocate order              | 0.790849673                     |
|                                                | 5    | Inventory management system (Fast rerouting of requirements)            | 0.758169935                     |
|                                                | 6    | Alternate distribution channels (modes of transportation)               | 0.705882353                     |
|                                                | 7    | Product commonality (flexible design)                                   | 0.660130719                     |
|                                                | 8    | Mode of communications (external, internal)                             | 0.712418301                     |
|                                                | 9    | Order postponement willingly by clients due to disruption               | 0.732026144                     |
|                                                | 10   | Risk management/business continuity planning                            | 0.705882353                     |
|                                                | 11   | Alternative technology development                                      | 0.712418301                     |
|                                                | 12   | Learning from experience                                                | 0.732026144                     |
|                                                | 13   | Process improvements (to reduce lead times)                             | 0.764705882                     |
|                                                | 14   | Monitoring early warning signals (near miss analysis)                   | 0.751633987                     |
|                                                | 15   | Customers demand forecasting                                            | 0.751633987                     |
|                                                | 16   | Contingency planning (drills, training)                                 | 0.745098039                     |
| <b>02. Budget overruns/ unplanned expenses</b> | 17   | People, products & assets visibility (real-time data on location)       | 0.745098039                     |
|                                                | 18   | Collaborative information exchange (among stakeholders)                 | 0.68627451                      |
|                                                | 19   | Business intelligence gatherings (future trends & technology awareness) | 0.673202614                     |
|                                                | 20   | Alternative suppliers/ sources to quickly reallocate order              | 0.712418301                     |
|                                                | 21   | Inventory management system (Fast rerouting of requirements)            | 0.745098039                     |
|                                                | 22   | Alternate distribution channels (modes of transportation)               | 0.738562092                     |
|                                                | 23   | Product commonality (flexible design)                                   | 0.666666667                     |
|                                                | 24   | Mode of communications (external, internal)                             | 0.647058824                     |
|                                                | 25   | Order postponement willingly by clients due to disruption               | 0.725490196                     |
|                                                | 26   | Risk management/business continuity planning                            | 0.68627451                      |
|                                                | 27   | Alternative technology development                                      | 0.751633987                     |
|                                                | 28   | Learning from experience                                                | 0.712418301                     |
|                                                | 29   | Process improvements (to reduce lead times)                             | 0.712418301                     |

|                                                               |    |                                                                         |             |
|---------------------------------------------------------------|----|-------------------------------------------------------------------------|-------------|
|                                                               | 30 | Monitoring early warning signals (near miss analysis)                   | 0.660130719 |
|                                                               | 31 | Customers demand forecasting                                            | 0.68627451  |
|                                                               | 32 | Contingency planning (drills, training)                                 | 0.725490196 |
| <b>03. Poor information coordination and decision making</b>  | 33 | People, products & assets visibility (real-time data on location)       | 0.77124183  |
|                                                               | 34 | Collaborative information exchange (among stakeholders)                 | 0.810457516 |
|                                                               | 35 | Business intelligence gatherings (future trends & technology awareness) | 0.758169935 |
|                                                               | 36 | Alternative suppliers/ sources to quickly reallocate order              | 0.738562092 |
|                                                               | 37 | Inventory management system (Fast rerouting of requirements)            | 0.725490196 |
|                                                               | 38 | Alternate distribution channels (modes of transportation)               | 0.732026144 |
|                                                               | 39 | Product commonality (flexible design)                                   | 0.673202614 |
|                                                               | 40 | Mode of communications (external, internal)                             | 0.751633987 |
|                                                               | 41 | Order postponement willingly by clients due to disruption               | 0.732026144 |
|                                                               | 42 | Risk management/business continuity planning                            | 0.68627451  |
|                                                               | 43 | Alternative technology development                                      | 0.68627451  |
|                                                               | 44 | Learning from experience                                                | 0.751633987 |
|                                                               | 45 | Process improvements (to reduce lead times)                             | 0.745098039 |
|                                                               | 46 | Monitoring early warning signals (near miss analysis)                   | 0.738562092 |
|                                                               | 47 | Customers demand forecasting                                            | 0.725490196 |
|                                                               | 48 | Contingency planning (drills, training)                                 | 0.705882353 |
| <b>04. Insufficient management oversight (on SC members)</b>  | 49 | People, products & assets visibility (real-time data on location)       | 0.751633987 |
|                                                               | 50 | Collaborative information exchange (among stakeholders)                 | 0.77124183  |
|                                                               | 51 | Business intelligence gatherings (future trends & technology awareness) | 0.68627451  |
|                                                               | 52 | Alternative suppliers/ sources to quickly reallocate order              | 0.712418301 |
|                                                               | 53 | Inventory management system (Fast rerouting of requirements)            | 0.738562092 |
|                                                               | 54 | Alternate distribution channels (modes of transportation)               | 0.758169935 |
|                                                               | 55 | Product commonality (flexible design)                                   | 0.68627451  |
|                                                               | 56 | Mode of communications (external, internal)                             | 0.68627451  |
|                                                               | 57 | Order postponement willingly by clients due to disruption               | 0.725490196 |
|                                                               | 58 | Risk management/business continuity planning                            | 0.692810458 |
|                                                               | 59 | Alternative technology development                                      | 0.732026144 |
|                                                               | 60 | Learning from experience                                                | 0.764705882 |
|                                                               | 61 | Process improvements (to reduce lead times)                             | 0.718954248 |
|                                                               | 62 | Monitoring early warning signals (near miss analysis)                   | 0.738562092 |
|                                                               | 63 | Customers demand forecasting                                            | 0.745098039 |
|                                                               | 64 | Contingency planning (drills, training)                                 | 0.725490196 |
| <b>05. Visibility of errors/ deficiencies to stakeholders</b> | 65 | People, products & assets visibility (real-time data on location)       | 0.718954248 |
|                                                               | 66 | Collaborative information exchange (among stakeholders)                 | 0.784313725 |
|                                                               | 67 | Business intelligence gatherings (future trends & technology awareness) | 0.679738562 |
|                                                               | 68 | Alternative suppliers/ sources to quickly reallocate order              | 0.692810458 |
|                                                               | 69 | Inventory management system (Fast rerouting of requirements)            | 0.666666667 |

|                                                                |     |                                                                         |             |
|----------------------------------------------------------------|-----|-------------------------------------------------------------------------|-------------|
|                                                                | 70  | Alternate distribution channels (modes of transportation)               | 0.712418301 |
|                                                                | 71  | Product commonality (flexible design)                                   | 0.692810458 |
|                                                                | 72  | Mode of communications (external, internal)                             | 0.68627451  |
|                                                                | 73  | Order postponement willingly by clients due to disruption               | 0.699346405 |
|                                                                | 74  | Risk management/business continuity planning                            | 0.68627451  |
|                                                                | 75  | Alternative technology development                                      | 0.692810458 |
|                                                                | 76  | Learning from experience                                                | 0.738562092 |
|                                                                | 77  | Process improvements (to reduce lead times)                             | 0.725490196 |
|                                                                | 78  | Monitoring early warning signals (near miss analysis)                   | 0.692810458 |
|                                                                | 79  | Customers demand forecasting                                            | 0.738562092 |
|                                                                | 80  | Contingency planning (drills, training)                                 | 0.699346405 |
| <b>06. Outsourcing to different suppliers</b>                  | 81  | People, products & assets visibility (real-time data on location)       | 0.712418301 |
|                                                                | 82  | Collaborative information exchange (among stakeholders)                 | 0.666666667 |
|                                                                | 83  | Business intelligence gatherings (future trends & technology awareness) | 0.699346405 |
|                                                                | 84  | Alternative suppliers/ sources to quickly reallocate order              | 0.745098039 |
|                                                                | 85  | Inventory management system (Fast rerouting of requirements)            | 0.738562092 |
|                                                                | 86  | Alternate distribution channels (modes of transportation)               | 0.745098039 |
|                                                                | 87  | Product commonality (flexible design)                                   | 0.666666667 |
|                                                                | 88  | Mode of communications (external, internal)                             | 0.68627451  |
|                                                                | 89  | Order postponement willingly by clients due to disruption               | 0.640522876 |
|                                                                | 90  | Risk management/business continuity planning                            | 0.692810458 |
|                                                                | 91  | Alternative technology development                                      | 0.679738562 |
|                                                                | 92  | Learning from experience                                                | 0.712418301 |
|                                                                | 93  | Process improvements (to reduce lead times)                             | 0.738562092 |
|                                                                | 94  | Monitoring early warning signals (near miss analysis)                   | 0.699346405 |
|                                                                | 95  | Customers demand forecasting                                            | 0.712418301 |
|                                                                | 96  | Contingency planning (drills, training)                                 | 0.699346405 |
| <b>07. Decentralization of suppliers/ operation facilities</b> | 97  | People, products & assets visibility (real-time data on location)       | 0.712418301 |
|                                                                | 98  | Collaborative information exchange (among stakeholders)                 | 0.725490196 |
|                                                                | 99  | Business intelligence gatherings (future trends & technology awareness) | 0.673202614 |
|                                                                | 100 | Alternative suppliers/ sources to quickly reallocate order              | 0.758169935 |
|                                                                | 101 | Inventory management system (Fast rerouting of requirements)            | 0.758169935 |
|                                                                | 102 | Alternate distribution channels (modes of transportation)               | 0.745098039 |
|                                                                | 103 | Product commonality (flexible design)                                   | 0.68627451  |
|                                                                | 104 | Mode of communications (external, internal)                             | 0.712418301 |
|                                                                | 105 | Order postponement willingly by clients due to disruption               | 0.673202614 |
|                                                                | 106 | Risk management/business continuity planning                            | 0.647058824 |
|                                                                | 107 | Alternative technology development                                      | 0.673202614 |
|                                                                | 108 | Learning from experience                                                | 0.718954248 |
|                                                                | 109 | Process improvements (to reduce lead times)                             | 0.738562092 |
|                                                                | 110 | Monitoring early warning signals (near miss analysis)                   | 0.705882353 |
|                                                                | 111 | Customers demand forecasting                                            | 0.705882353 |

|                                                    |     |                                                                         |             |
|----------------------------------------------------|-----|-------------------------------------------------------------------------|-------------|
|                                                    | 112 | Contingency planning (drills, training)                                 | 0.712418301 |
| <b>08. Severe price fluctuations in the market</b> | 113 | People, products & assets visibility (real-time data on location)       | 0.745098039 |
|                                                    | 114 | Collaborative information exchange (among stakeholders)                 | 0.732026144 |
|                                                    | 115 | Business intelligence gatherings (future trends & technology awareness) | 0.705882353 |
|                                                    | 116 | Alternative suppliers/ sources to quickly reallocate order              | 0.745098039 |
|                                                    | 117 | Inventory management system (Fast rerouting of requirements)            | 0.725490196 |
|                                                    | 118 | Alternate distribution channels (modes of transportation)               | 0.725490196 |
|                                                    | 119 | Product commonality (flexible design)                                   | 0.699346405 |
|                                                    | 120 | Mode of communications (external, internal)                             | 0.660130719 |
|                                                    | 121 | Order postponement willingly by clients due to disruption               | 0.732026144 |
|                                                    | 122 | Risk management/business continuity planning                            | 0.653594771 |
|                                                    | 123 | Alternative technology development                                      | 0.718954248 |
|                                                    | 124 | Learning from experience                                                | 0.712418301 |
|                                                    | 125 | Process improvements (to reduce lead times)                             | 0.699346405 |
|                                                    | 126 | Monitoring early warning signals (near miss analysis)                   | 0.660130719 |
|                                                    | 127 | Customers demand forecasting                                            | 0.732026144 |
|                                                    | 128 | Contingency planning (drills, training)                                 | 0.673202614 |
| <b>09. Exposure to natural disasters</b>           | 129 | People, products & assets visibility (real-time data on location)       | 0.77124183  |
|                                                    | 130 | Collaborative information exchange (among stakeholders)                 | 0.77124183  |
|                                                    | 131 | Business intelligence gatherings (future trends & technology awareness) | 0.745098039 |
|                                                    | 132 | Alternative suppliers/ sources to quickly reallocate order              | 0.732026144 |
|                                                    | 133 | Inventory management system (Fast rerouting of requirements)            | 0.732026144 |
|                                                    | 134 | Alternate distribution channels (modes of transportation)               | 0.732026144 |
|                                                    | 135 | Product commonality (flexible design)                                   | 0.705882353 |
|                                                    | 136 | Mode of communications (external, internal)                             | 0.68627451  |
|                                                    | 137 | Order postponement willingly by clients due to disruption               | 0.725490196 |
|                                                    | 138 | Risk management/business continuity planning                            | 0.745098039 |
|                                                    | 139 | Alternative technology development                                      | 0.764705882 |
|                                                    | 140 | Learning from experience                                                | 0.712418301 |
|                                                    | 141 | Process improvements (to reduce lead times)                             | 0.738562092 |
|                                                    | 142 | Monitoring early warning signals (near miss analysis)                   | 0.725490196 |
|                                                    | 143 | Customers demand forecasting                                            | 0.718954248 |
|                                                    | 144 | Contingency planning (drills, training)                                 | 0.725490196 |
| <b>10. Pressure from public opinion</b>            | 145 | People, products & assets visibility (real-time data on location)       | 0.718954248 |
|                                                    | 146 | Collaborative information exchange (among stakeholders)                 | 0.712418301 |
|                                                    | 147 | Business intelligence gatherings (future trends & technology awareness) | 0.738562092 |
|                                                    | 148 | Alternative suppliers/ sources to quickly reallocate order              | 0.705882353 |
|                                                    | 149 | Inventory management system (Fast rerouting of requirements)            | 0.692810458 |
|                                                    | 150 | Alternate distribution channels (modes of transportation)               | 0.699346405 |
|                                                    | 151 | Product commonality (flexible design)                                   | 0.68627451  |

|                                                                                         |     |                                                                         |             |
|-----------------------------------------------------------------------------------------|-----|-------------------------------------------------------------------------|-------------|
|                                                                                         | 152 | Mode of communications (external, internal)                             | 0.660130719 |
|                                                                                         | 153 | Order postponement willingly by clients due to disruption               | 0.647058824 |
|                                                                                         | 154 | Risk management/business continuity planning                            | 0.673202614 |
|                                                                                         | 155 | Alternative technology development                                      | 0.699346405 |
|                                                                                         | 156 | Learning from experience                                                | 0.692810458 |
|                                                                                         | 157 | Process improvements (to reduce lead times)                             | 0.679738562 |
|                                                                                         | 158 | Monitoring early warning signals (near miss analysis)                   | 0.679738562 |
|                                                                                         | 159 | Customers demand forecasting                                            | 0.725490196 |
|                                                                                         | 160 | Contingency planning (drills, training)                                 | 0.679738562 |
|                                                                                         | 161 | People, products & assets visibility (real-time data on location)       | 0.718954248 |
| <b>11. Poor utilities<br/>(electrical<br/>power, water,<br/>sewer)<br/>availability</b> | 162 | Collaborative information exchange (among stakeholders)                 | 0.712418301 |
|                                                                                         | 163 | Business intelligence gatherings (future trends & technology awareness) | 0.712418301 |
|                                                                                         | 164 | Alternative suppliers/ sources to quickly reallocate order              | 0.725490196 |
|                                                                                         | 165 | Inventory management system (Fast rerouting of requirements)            | 0.68627451  |
|                                                                                         | 166 | Alternate distribution channels (modes of transportation)               | 0.68627451  |
|                                                                                         | 167 | Product commonality (flexible design)                                   | 0.679738562 |
|                                                                                         | 168 | Mode of communications (external, internal)                             | 0.68627451  |
|                                                                                         | 169 | Order postponement willingly by clients due to disruption               | 0.673202614 |
|                                                                                         | 170 | Risk management/business continuity planning                            | 0.620915033 |
|                                                                                         | 171 | Alternative technology development                                      | 0.692810458 |
|                                                                                         | 172 | Learning from experience                                                | 0.660130719 |
|                                                                                         | 173 | Process improvements (to reduce lead times)                             | 0.692810458 |
|                                                                                         | 174 | Monitoring early warning signals (near miss analysis)                   | 0.673202614 |
|                                                                                         | 175 | Customers demand forecasting                                            | 0.699346405 |
|                                                                                         | 176 | Contingency planning (drills, training)                                 | 0.692810458 |
| <b>12. Products<br/>quality<br/>problems</b>                                            | 177 | People, products & assets visibility (real-time data on location)       | 0.718954248 |
|                                                                                         | 178 | Collaborative information exchange (among stakeholders)                 | 0.68627451  |
|                                                                                         | 179 | Business intelligence gatherings (future trends & technology awareness) | 0.673202614 |
|                                                                                         | 180 | Alternative suppliers/ sources to quickly reallocate order              | 0.712418301 |
|                                                                                         | 181 | Inventory management system (Fast rerouting of requirements)            | 0.705882353 |
|                                                                                         | 182 | Alternate distribution channels (modes of transportation)               | 0.68627451  |
|                                                                                         | 183 | Product commonality (flexible design)                                   | 0.692810458 |
|                                                                                         | 184 | Mode of communications (external, internal)                             | 0.679738562 |
|                                                                                         | 185 | Order postponement willingly by clients due to disruption               | 0.705882353 |
|                                                                                         | 186 | Risk management/business continuity planning                            | 0.68627451  |
|                                                                                         | 187 | Alternative technology development                                      | 0.699346405 |
|                                                                                         | 188 | Learning from experience                                                | 0.653594771 |
|                                                                                         | 189 | Process improvements (to reduce lead times)                             | 0.699346405 |
|                                                                                         | 190 | Monitoring early warning signals (near miss analysis)                   | 0.712418301 |
|                                                                                         | 191 | Customers demand forecasting                                            | 0.692810458 |
|                                                                                         | 192 | Contingency planning (drills, training)                                 | 0.699346405 |
|                                                                                         | 193 | People, products & assets visibility (real-time data on location)       | 0.745098039 |

|                                                           |     |                                                                         |             |
|-----------------------------------------------------------|-----|-------------------------------------------------------------------------|-------------|
| <b>13. Transportation disruption during operations</b>    | 194 | Collaborative information exchange (among stakeholders)                 | 0.732026144 |
|                                                           | 195 | Business intelligence gatherings (future trends & technology awareness) | 0.699346405 |
|                                                           | 196 | Alternative suppliers/ sources to quickly reallocate order              | 0.732026144 |
|                                                           | 197 | Inventory management system (Fast rerouting of requirements)            | 0.738562092 |
|                                                           | 198 | Alternate distribution channels (modes of transportation)               | 0.777777778 |
|                                                           | 199 | Product commonality (flexible design)                                   | 0.679738562 |
|                                                           | 200 | Mode of communications (external, internal)                             | 0.718954248 |
|                                                           | 201 | Order postponement willingly by clients due to disruption               | 0.732026144 |
|                                                           | 202 | Risk management/business continuity planning                            | 0.660130719 |
|                                                           | 203 | Alternative technology development                                      | 0.679738562 |
|                                                           | 204 | Learning from experience                                                | 0.699346405 |
|                                                           | 205 | Process improvements (to reduce lead times)                             | 0.705882353 |
|                                                           | 206 | Monitoring early warning signals (near miss analysis)                   | 0.712418301 |
|                                                           | 207 | Customers demand forecasting                                            | 0.699346405 |
|                                                           | 208 | Contingency planning (drills, training)                                 | 0.68627451  |
| <b>14. Limited production &amp; distribution capacity</b> | 209 | People, products & assets visibility (real-time data on location)       | 0.732026144 |
|                                                           | 210 | Collaborative information exchange (among stakeholders)                 | 0.725490196 |
|                                                           | 211 | Business intelligence gatherings (future trends & technology awareness) | 0.77124183  |
|                                                           | 212 | Alternative suppliers/ sources to quickly reallocate order              | 0.718954248 |
|                                                           | 213 | Inventory management system (Fast rerouting of requirements)            | 0.732026144 |
|                                                           | 214 | Alternate distribution channels (modes of transportation)               | 0.679738562 |
|                                                           | 215 | Product commonality (flexible design)                                   | 0.732026144 |
|                                                           | 216 | Mode of communications (external, internal)                             | 0.699346405 |
|                                                           | 217 | Order postponement willingly by clients due to disruption               | 0.68627451  |
|                                                           | 218 | Risk management/business continuity planning                            | 0.699346405 |
|                                                           | 219 | Alternative technology development                                      | 0.745098039 |
|                                                           | 220 | Learning from experience                                                | 0.745098039 |
|                                                           | 221 | Process improvements (to reduce lead times)                             | 0.758169935 |
|                                                           | 222 | Monitoring early warning signals (near miss analysis)                   | 0.810457516 |
|                                                           | 223 | Customers demand forecasting                                            | 0.758169935 |
|                                                           | 224 | Contingency planning (drills, training)                                 | 0.68627451  |
| <b>15. Exposure to political disruptions</b>              | 225 | People, products & assets visibility (real-time data on location)       | 0.679738562 |
|                                                           | 226 | Collaborative information exchange (among stakeholders)                 | 0.679738562 |
|                                                           | 227 | Business intelligence gatherings (future trends & technology awareness) | 0.640522876 |
|                                                           | 228 | Alternative suppliers/ sources to quickly reallocate order              | 0.647058824 |
|                                                           | 229 | Inventory management system (Fast rerouting of requirements)            | 0.633986928 |
|                                                           | 230 | Alternate distribution channels (modes of transportation)               | 0.607843137 |
|                                                           | 231 | Product commonality (flexible design)                                   | 0.633986928 |
|                                                           | 232 | Mode of communications (external, internal)                             | 0.666666667 |
|                                                           | 233 | Order postponement willingly by clients due to disruption               | 0.640522876 |

|     |                                                       |             |
|-----|-------------------------------------------------------|-------------|
| 234 | Risk management/business continuity planning          | 0.653594771 |
| 235 | Alternative technology development                    | 0.660130719 |
| 236 | Learning from experience                              | 0.647058824 |
| 237 | Process improvements (to reduce lead times)           | 0.679738562 |
| 238 | Monitoring early warning signals (near miss analysis) | 0.679738562 |
| 239 | Customers demand forecasting                          | 0.614379085 |
| 240 | Contingency planning (drills, training)               | 0.68627451  |
